# Supplementary material
Source: Springer Nature journal article supplement (https://www.springermedizin.de/resource/supplementary/12876_2011_622_MOESM1_ESM.pdf/9437392)
Supplement: MOESM1 [file 9437392]

**Initial Sample Population**  
n=534 Victorian IBD database

**Study Population** n= 101  
(0-18 years at diagnosis IBD)

**VPDs Serology**  
94 at least one record

**AUDIT: Hospital Records** n=101

**AUDIT: ACIR Records**

- 51 records
- 50 not on register

101 letters sent to parent/ guardians

**Patients Excluded** n=52

- 3 unknown address
- 3 refused consent
- 45 nil response

50 consents received from parent/ guardians

42 interviews completed

33 GP Questionnaires
